# Supplementary material for: Topologically associating domain boundaries are required for normal genome function
Source: Commun Biol. 2023 Apr 20;6:435. doi: 10.1038/s42003-023-04819-w (PMC10119121; doi:10.1038/s42003-023-04819-w)
Supplement: Supplementary file 2 — Description Of Additional Supplementary Files [file 42003_2023_4819_MOESM2_ESM.pdf]

## Description of Additional Supplementary Files

**File name:** Supplementary Data 1

**Description:** ChIP-seq data used for correlation-based computational analysis and prioritization of TAD boundaries for deletion *in vivo*.

**File name:** Supplementary Data 2

**Description:** Correlation analyses and CTCF cluster scores used in the prioritization of TAD boundary loci for deletion *in vivo*.

**File name:** Supplementary Data 3

**Description:** Locus features of the TAD boundaries selected for individual deletions in this study.

**File name:** Supplementary Data 4

**Description:** Mendelian segregation data.

**File name:** Supplementary Data 5

**Description:** Statistically significant differentially expressed genes across select tissues in homozygous TAD boundary mutants versus wild-type embryos at E11.5.

**File name:** Supplementary Data 6

**Description:** qPCR source data.

**File name:** Supplementary Data 7

**Description:** Summary results from comprehensive phenotyping of adult mice in this study.

**File name:** Supplementary Data 8

**Description:** TAD boundaries and intra-TAD Boundary B2 sequences targeted for deletion *in vivo* and corresponding CRISPR sgRNA templates.

**File name:** Supplementary Data 9

**Description:** Primers used for screening and genotyping of TAD boundary and other loci generated using CRISPR-mediated deletions.

**File name:** Supplementary Data 10

**Description:** Availability of TAD boundary knockout mice.

**File name:** Supplementary Data 11

**Description:** qRT-PCR gene-specific primers.
